# Supplementary figures and images for: Metallome of cerebrovascular endothelial cells infected with Toxoplasma gondii using μ-XRF imaging and inductively coupled plasma mass spectrometry
Source: Royal Society of Chemistry journal article supplement (doi:10.1039/c8mt00136g), 2018-09-05

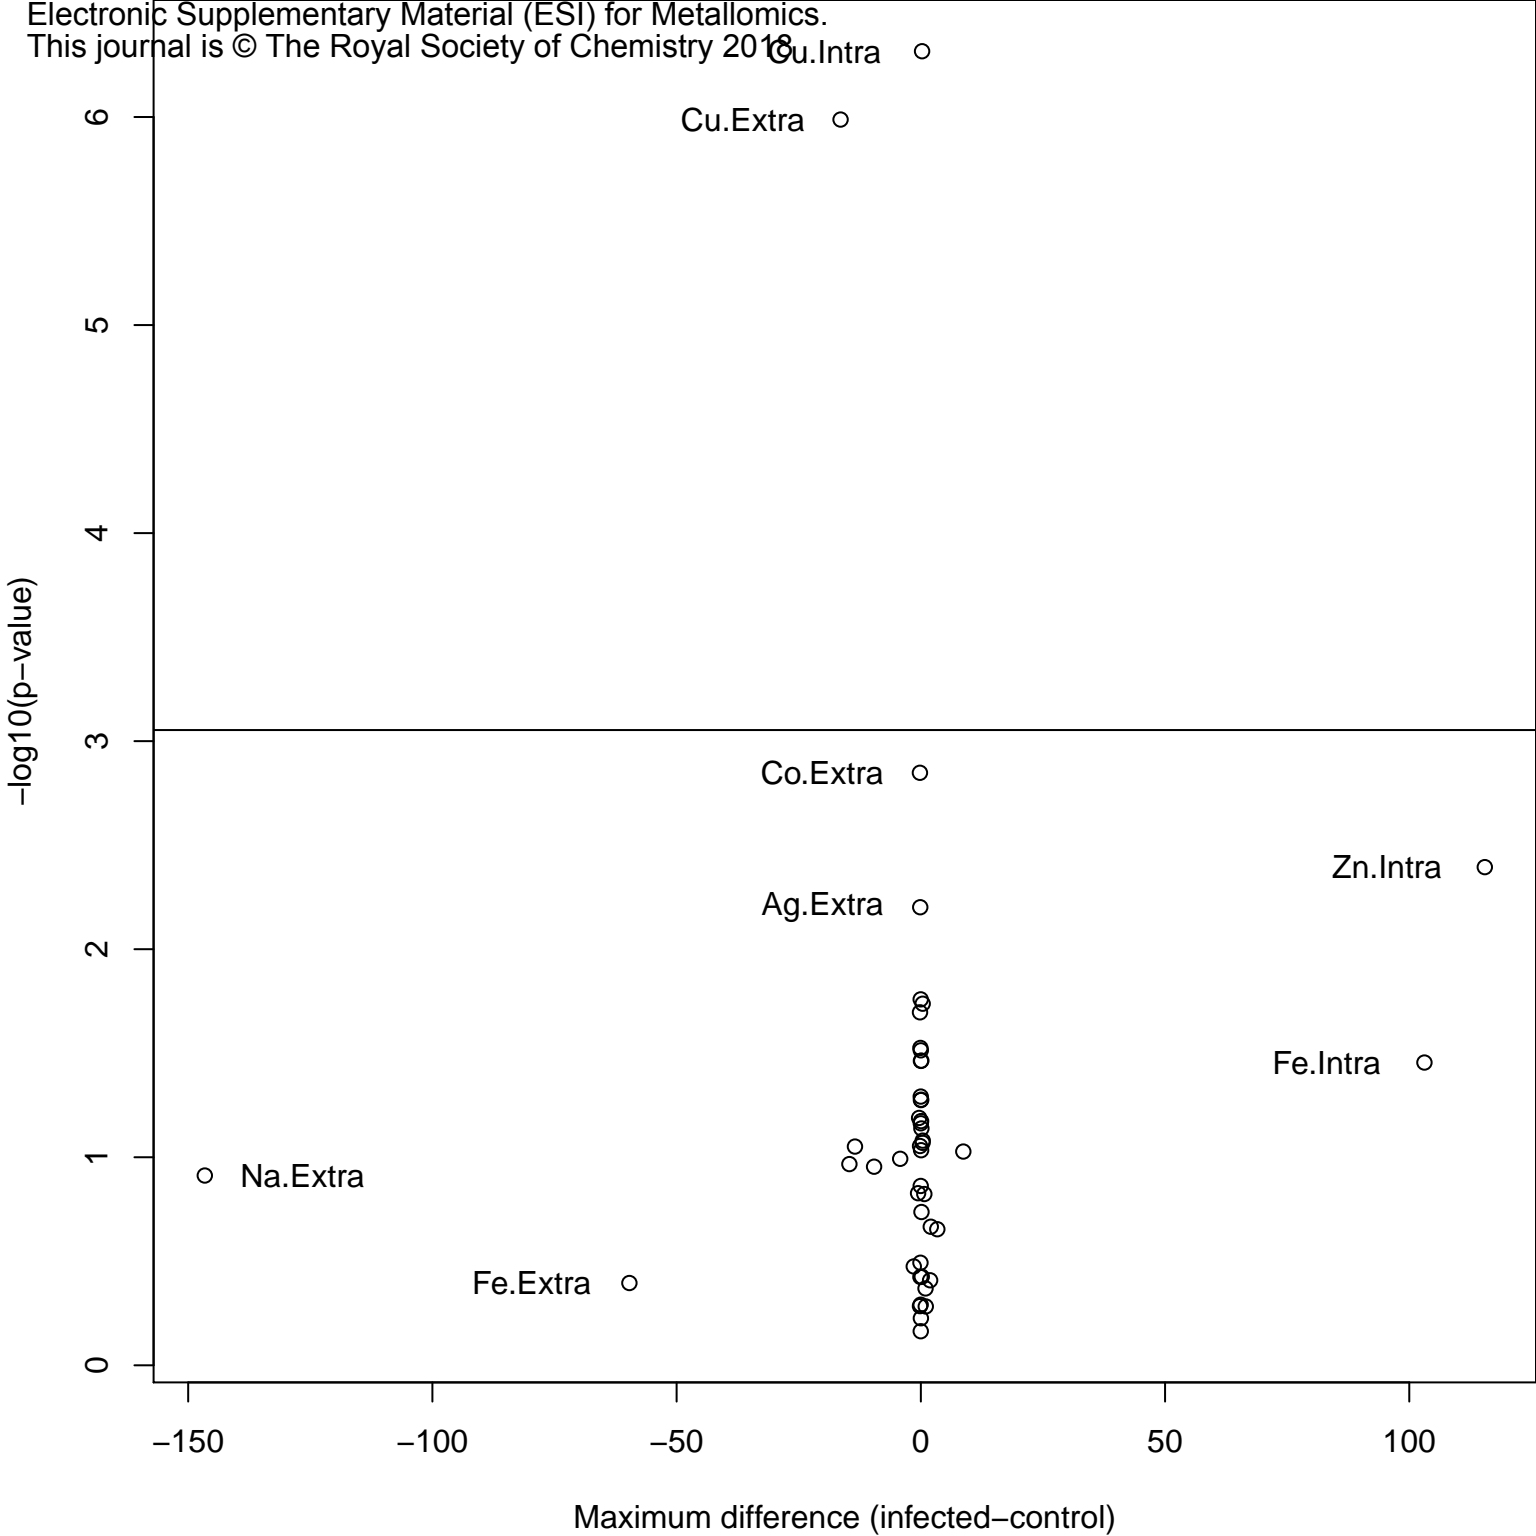

Supplement: c8mt00136g2.pdf [file c8mt00136g2.pdf]

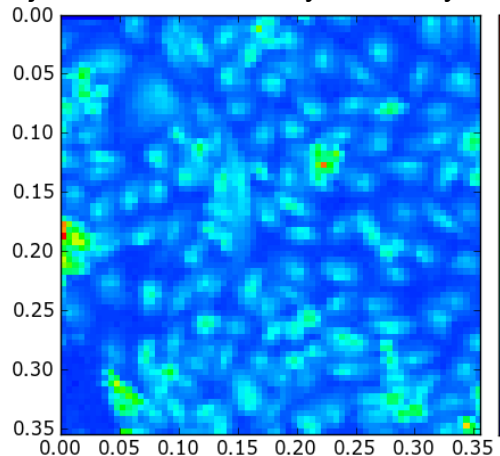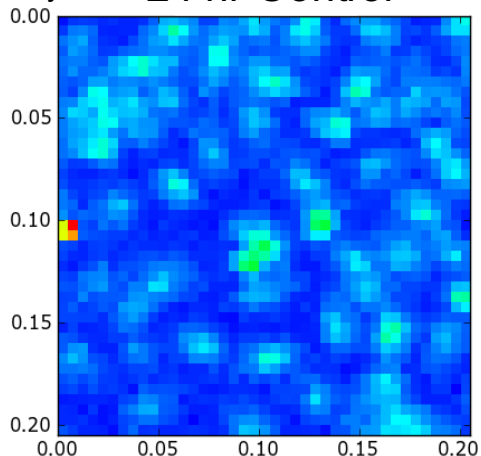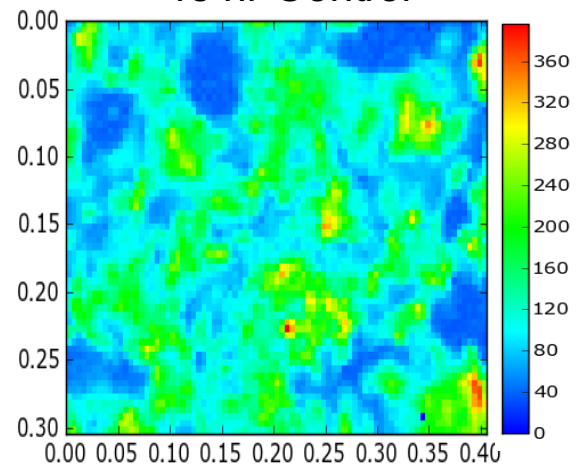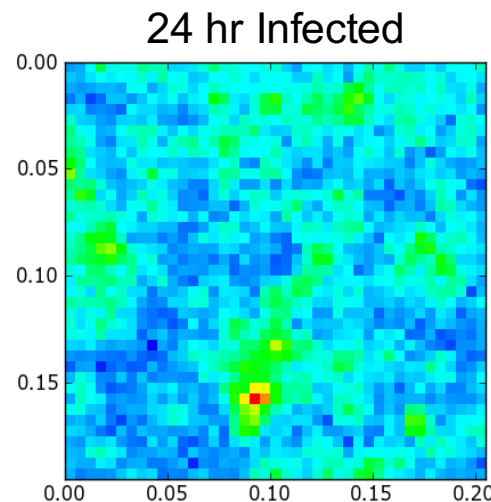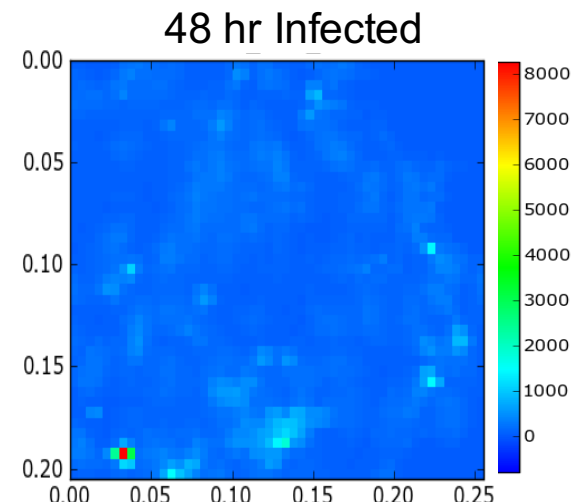

Supplement: c8mt00136g3.pdf [file c8mt00136g3.pdf]
